# Supplementary material for: CoFeP/NC@CoP/Ni2P heterostructure for efficient overall water splitting
Source: Royal Society of Chemistry journal article supplement (doi:10.1039/d2nj04240a), 2022-11-29
Supplement: d2nj04240a1.pdf [file d2nj04240a1.pdf]

Electronic Supplementary Material for New Journal of Chemistry

## **CoFeP/NC@CoP/Ni<sub>2</sub>P Heterostructure for Efficient Overall Water**

### **Splitting**

*Ruru Fu<sup>a</sup>, Qingze Jiao<sup>a,b</sup>, Chao Yang<sup>a</sup>, Xiaoguang Jiao<sup>a</sup>, Xiaoguang Zhang<sup>a</sup>, Caihong Feng<sup>a</sup>, Hansheng Li<sup>a</sup>, Yaoyuan Zhang<sup>a</sup>, Yun Zhao<sup>\*a</sup>*

<sup>a</sup>School of Chemistry and Chemical Engineering, Beijing Institute of Technology, Beijing 100081, China;

<sup>b</sup>School of Materials and Environment, Beijing Institute of Technology, Zhuhai, Guangdong 519085, China

\*Corresponding author

Yun Zhao, E-mail: zhaoyun@bit.edu.cn;

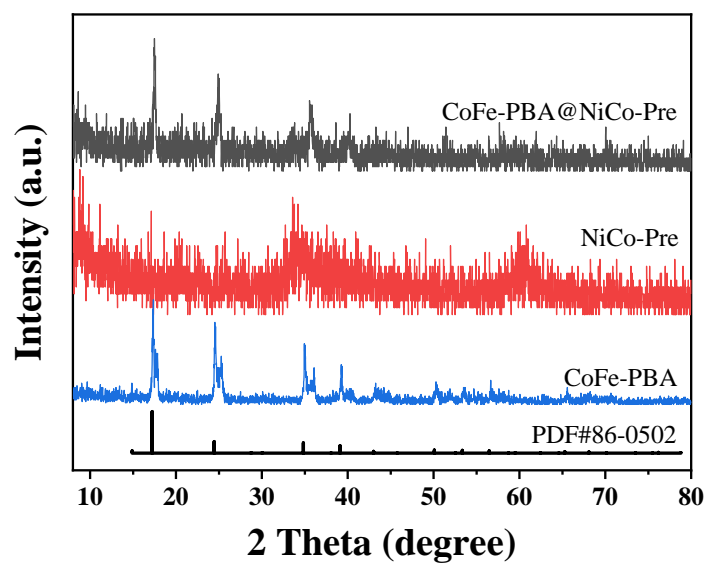

Fig. S1. XRD patterns of the CoFe-PBA, NiCo-Pre, Co-Fe PBA@NiCo-Pre

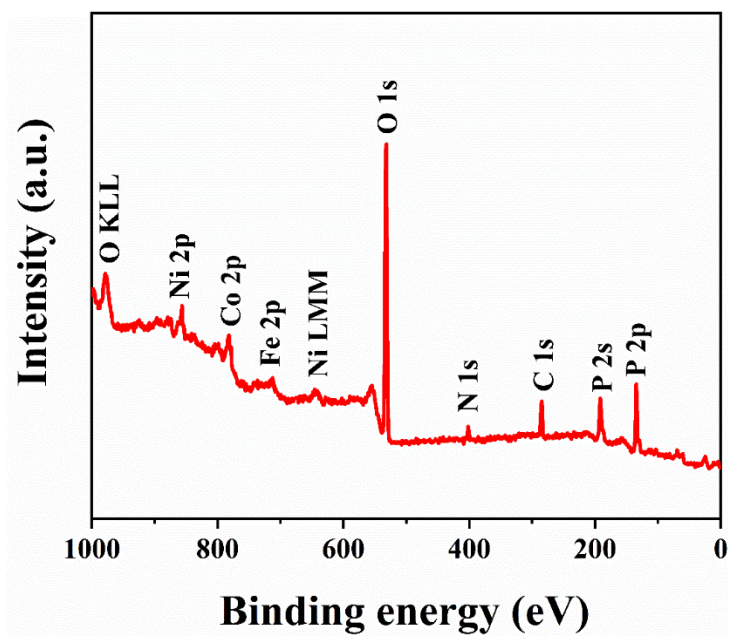

Fig. S2. The XPS survey spectrum of the CoFeP/NC@CoP/Ni<sub>2</sub>P

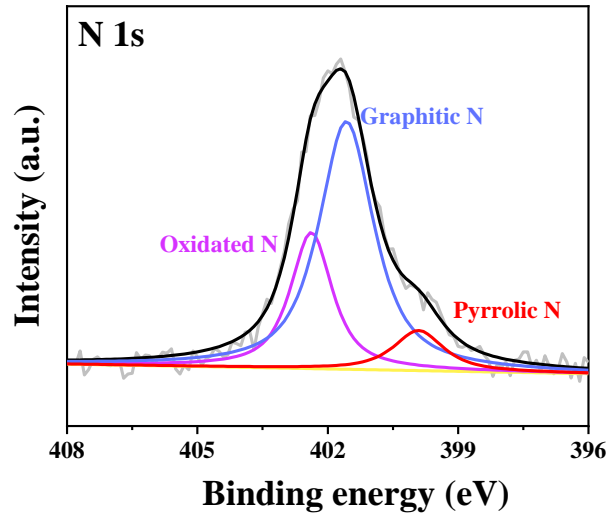

Fig. S3. N 1s spectrum of CoFeP/NC@CoP/Ni<sub>2</sub>P

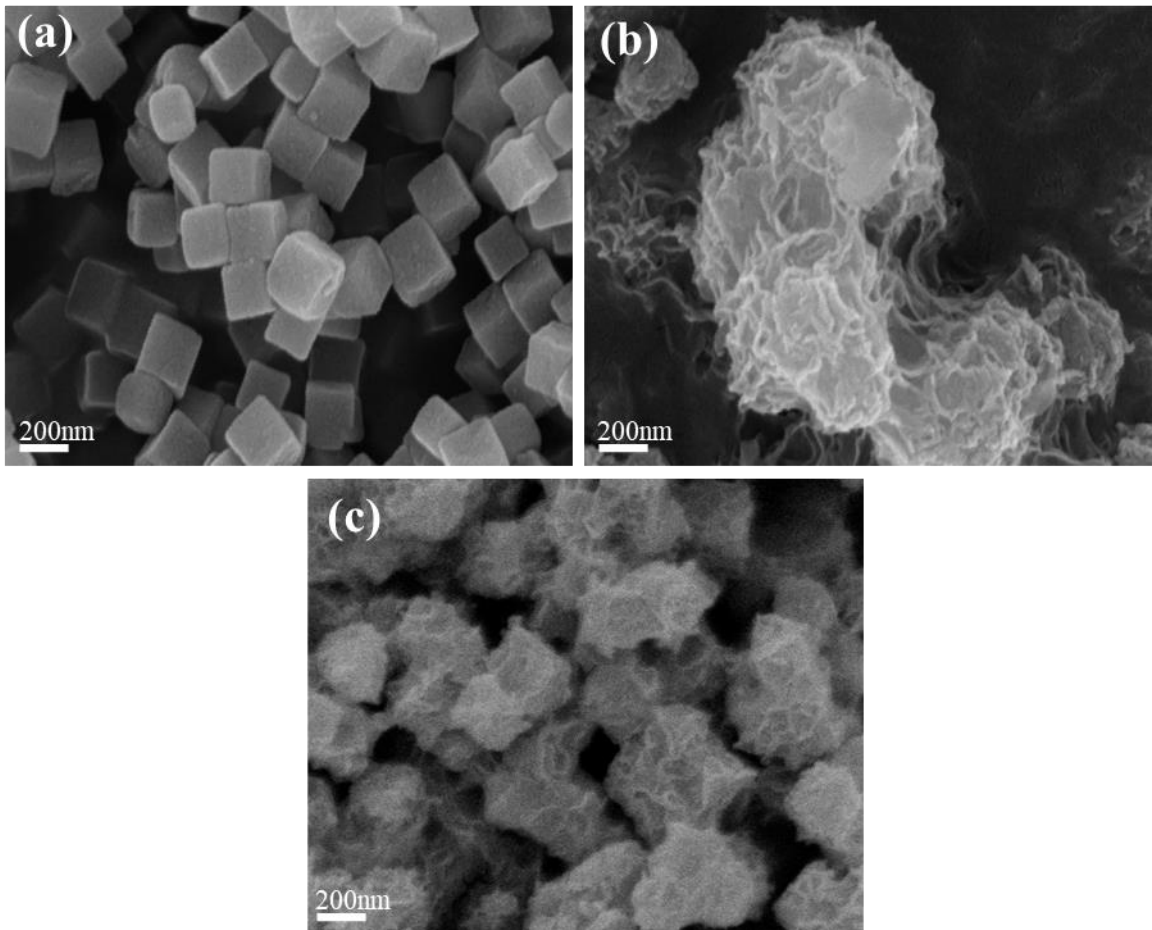

Fig. S4. SEM images of the CoFe-PBA (a), NiCo-Pre (b), Co-Fe PBA@NiCo-Pre (c)

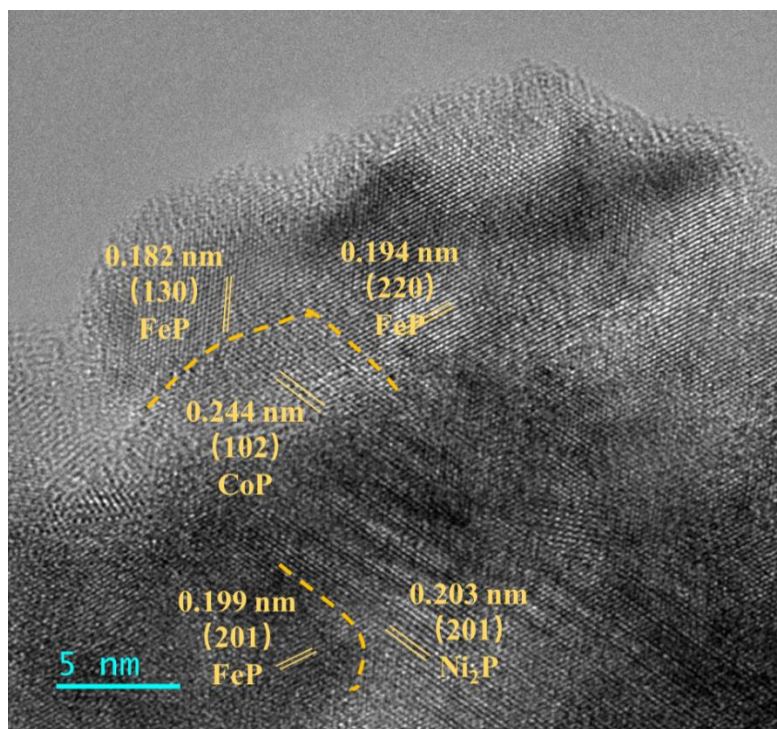

Fig. S5. TEM image of CoFeP/NC@CoP/Ni<sub>2</sub>P

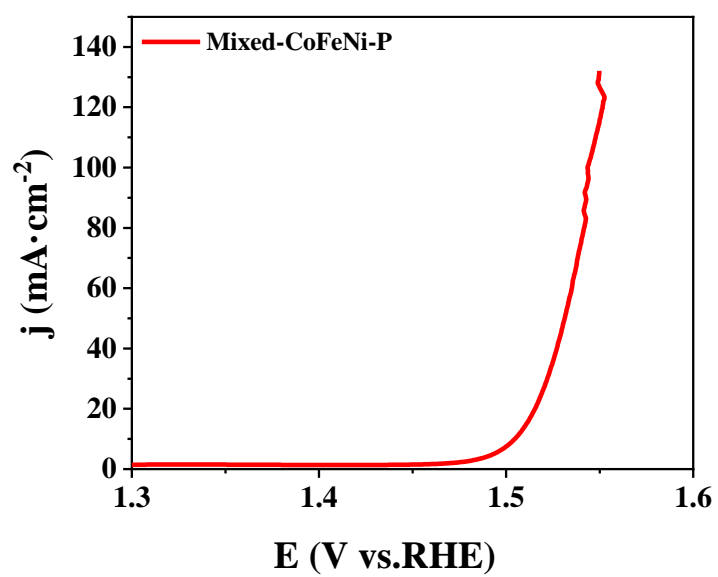

Fig. S6. OER polarization curve of Mixed-CoFeNi-P

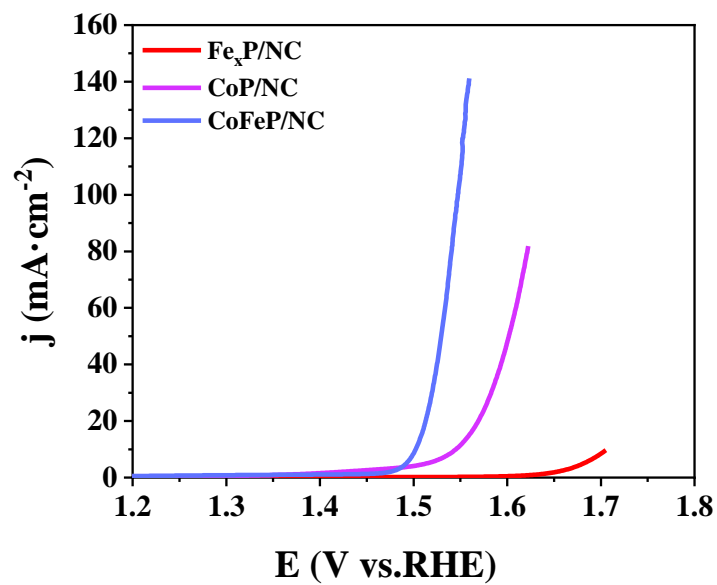

Fig. S7. OER polarization curves for different samples

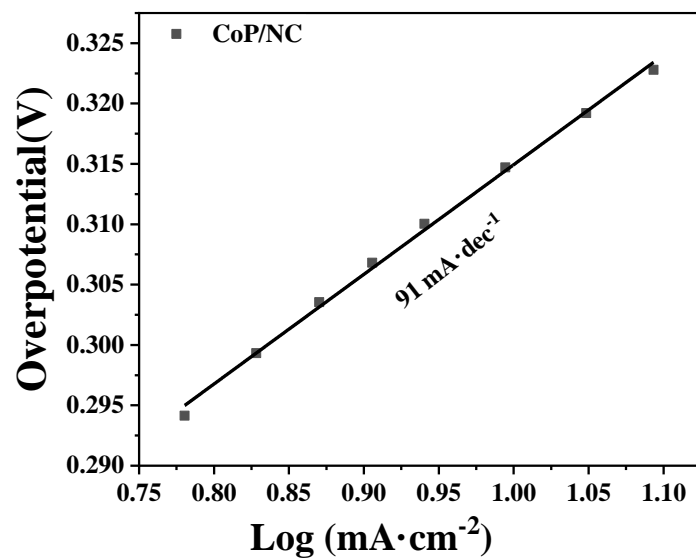

Fig. S8. Tafel slopes of CoP/NC extracted from the corresponding LSV polarization curves for OER

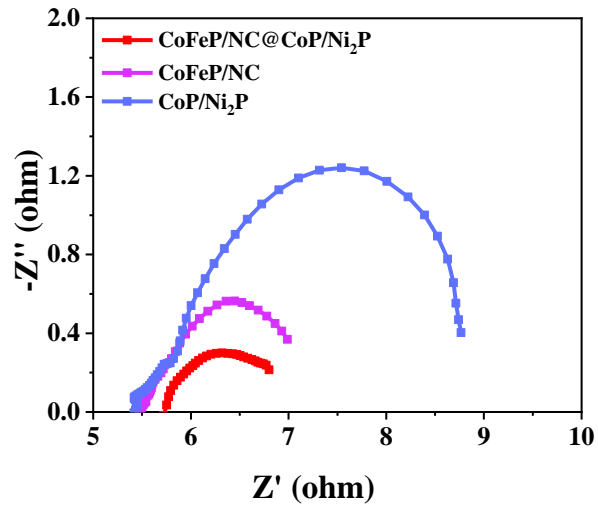

Fig. S9. Electrochemical impedance spectra of CoFeP/NC@CoP/Ni<sub>2</sub>P, CoFeP/NC and CoP/Ni<sub>2</sub>P (d) for OER

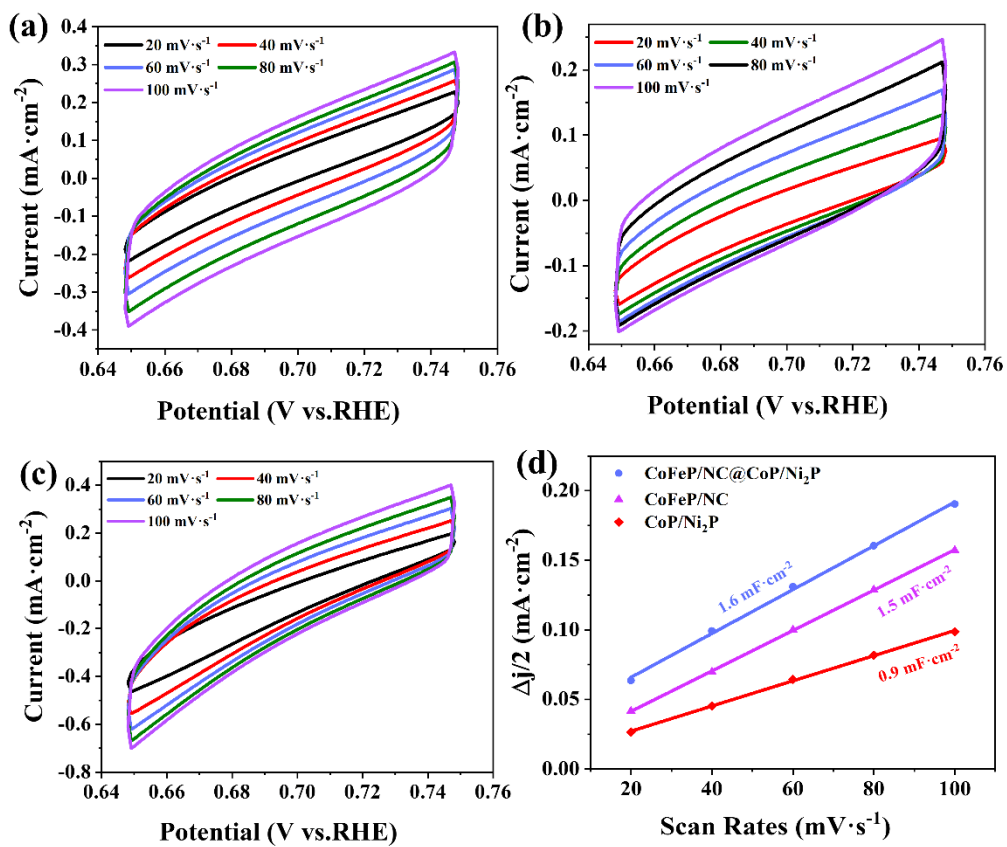

Fig. S10. CVs measurement with various scan rates for CoFeP/NC (a), CoP/Ni<sub>2</sub>P (b), CoFeP/NC@CoP/Ni<sub>2</sub>P (c) in 1 M KOH and Double-layer capacitance ( $C_{dl}$ ) of CoFeP/NC@CoP/Ni<sub>2</sub>P, CoFeP/NC, CoP/Ni<sub>2</sub>P (d).

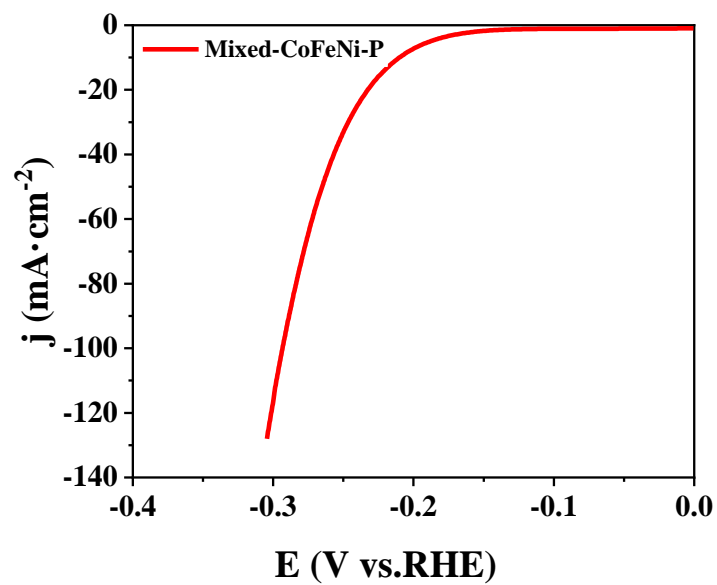

Fig. S11. HER polarization curve of Mixed-CoFeNi-P

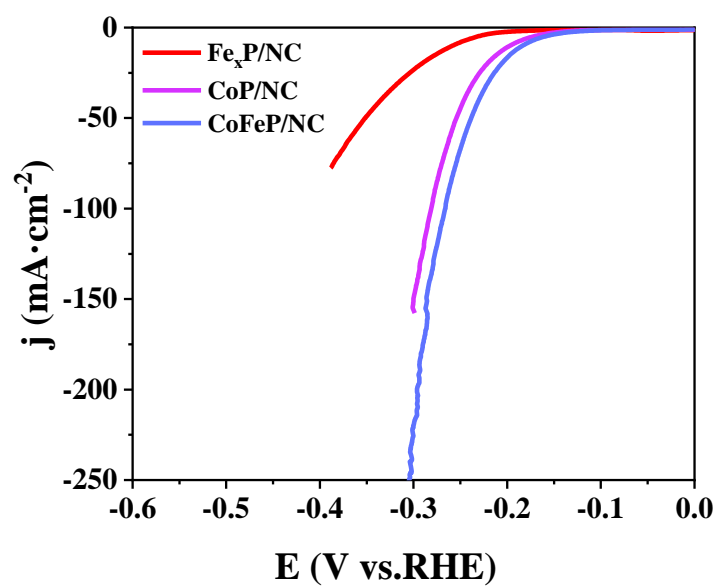

Fig. S12. HER polarization curves for different samples

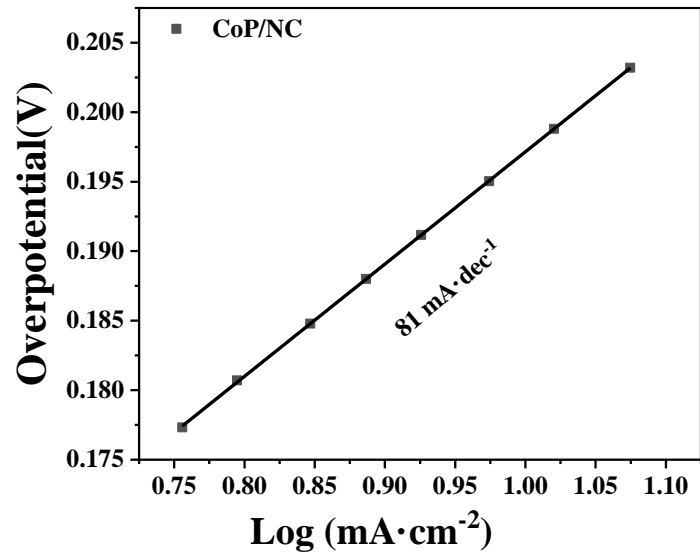

Fig. S13. Tafel slopes of CoP/NC extracted from the corresponding LSV polarization curves for HER

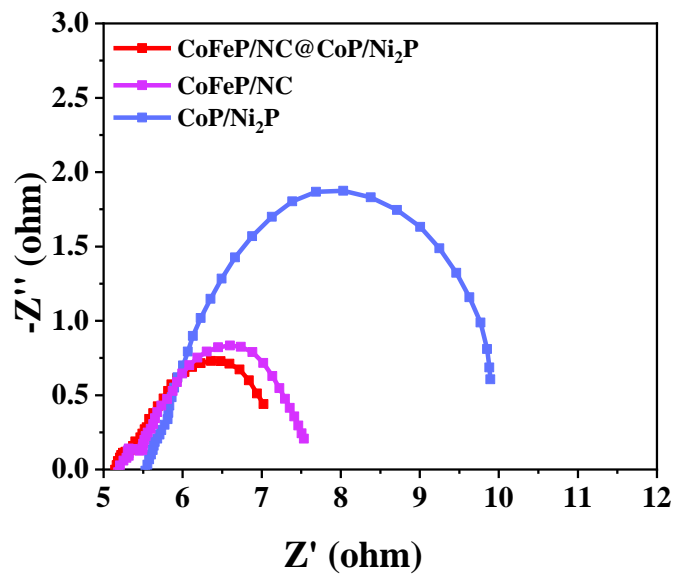

Fig. S14. Electrochemical impedance spectra of CoFeP/NC@CoP/Ni<sub>2</sub>P, CoFeP/NC and CoP/Ni<sub>2</sub>P (d) for HER



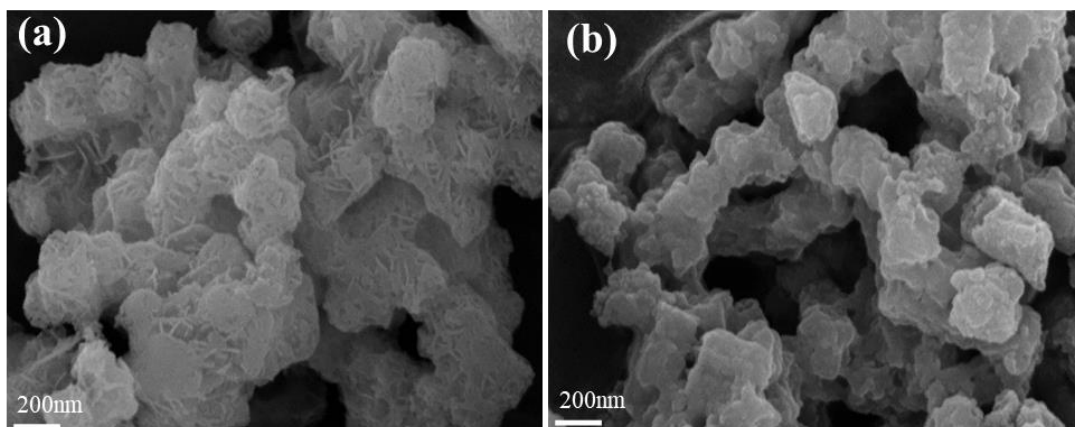

Fig. S15. SEM images of post-HER (a) and post-OER (b) CoFeP/NC@CoP/Ni<sub>2</sub>P

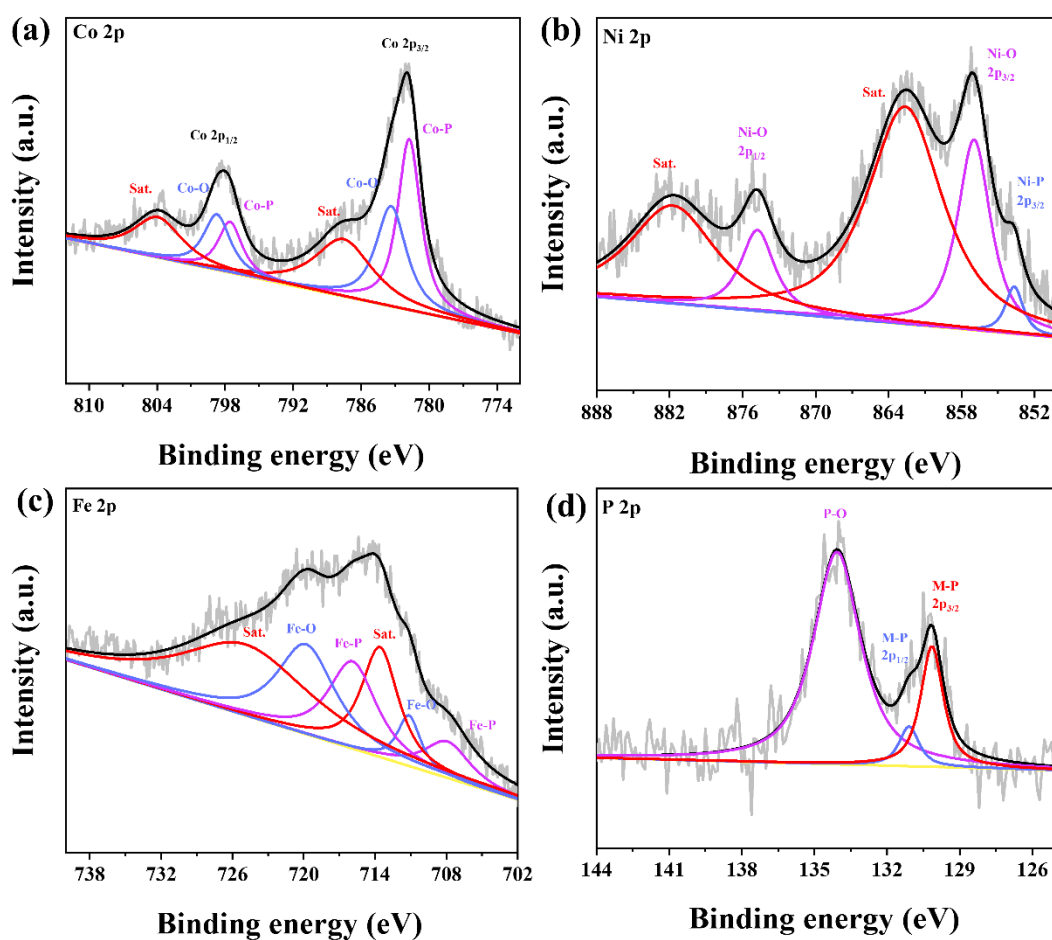

Fig. S16. High-resolution Co 2p (a), Ni 2p (b), Fe 2p (c), P 2p (d) XPS spectra of the post-HER CoFeP/NC@CoP/Ni<sub>2</sub>P

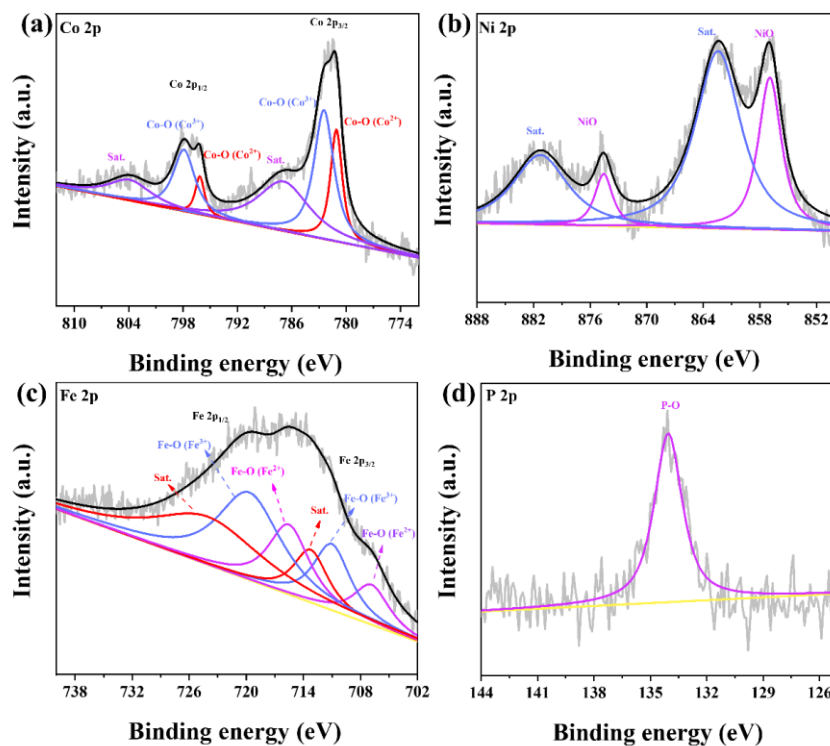

Fig. S17. High-resolution Co 2p (a), Ni 2p (b), Fe 2p (c), P 2p (d) XPS spectra of the post-OER CoFeP/NC@CoP/Ni<sub>2</sub>P

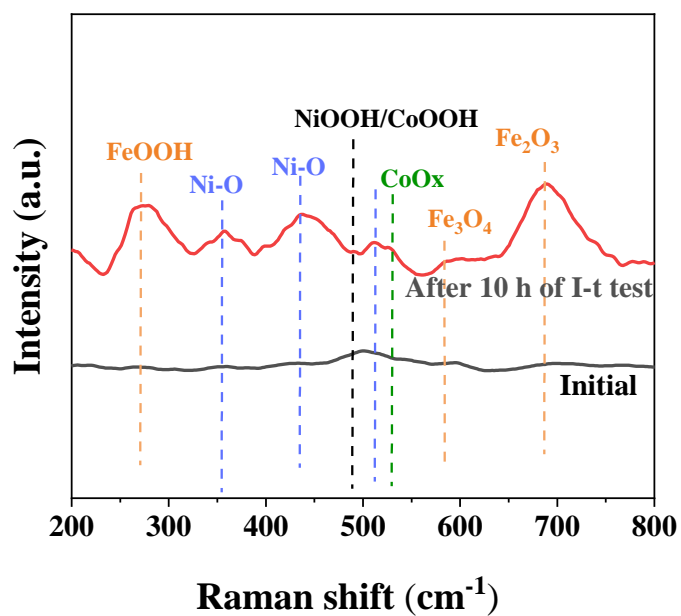

Fig. S18. Raman spectra of the CoFeP/NC@CoP/Ni<sub>2</sub>P before and after the long-term stability test for 10 h
